# Supplementary material for: Polymerization and editing modes of a high-fidelity DNA polymerase are linked by a well-defined path
Source: PubMed Central journal article supplement (PMC7584608; doi:10.1038/s41467-020-19165-2), 2020-10-23
Supplement: 41467_2020_19165_MOESM2_ESM.pdf [file 41467_2020_19165_MOESM2_ESM.pdf]

## Description of Additional Supplementary Files

File Name: Supplementary Movie 1

Description: Minimum free energy path for conformational switching from polymerization to exonuclease mode for the Pol III holoenzyme complex. Individual subunits are colored as follows:  $\alpha$  is orange;  $\epsilon$  is light green; theta is magenta; primer DNA strand is light blue; template DNA strand is dark blue; mismatched T base at the primer end is red; pol and exo active site residues are shown as black spheres. The PHP domain, portions of the fingers domain and the  $\theta$  subunit were omitted in the latter half of the video to ensure unobstructed view of the primer.

File Name: Supplementary Movie 2

Description: Kinetically distinct intermediates along the pol-to-exo mode transition identified from the multi-ensemble Markov model. Individual subunits are colored as follows:  $\alpha$  is orange;  $\epsilon$  is light green;  $\theta$  is magenta; primer DNA strand is light blue; template DNA strand is dark blue; mismatched T base at the primer end is red; pol and exo active site residues are shown as black spheres. Amino acid residues from the  $\alpha$  and  $\epsilon$  subunits that contact the dsDNA during the transition are colored by atom type (C is dark green, O is red, N is blue, S is yellow) and shown in stick representation.
